# Supplementary material
Source: Springer Nature journal article supplement (https://www.springermedizin.de/resource/supplementary/12936_2010_1248_MOESM1_ESM.pdf/9549322)

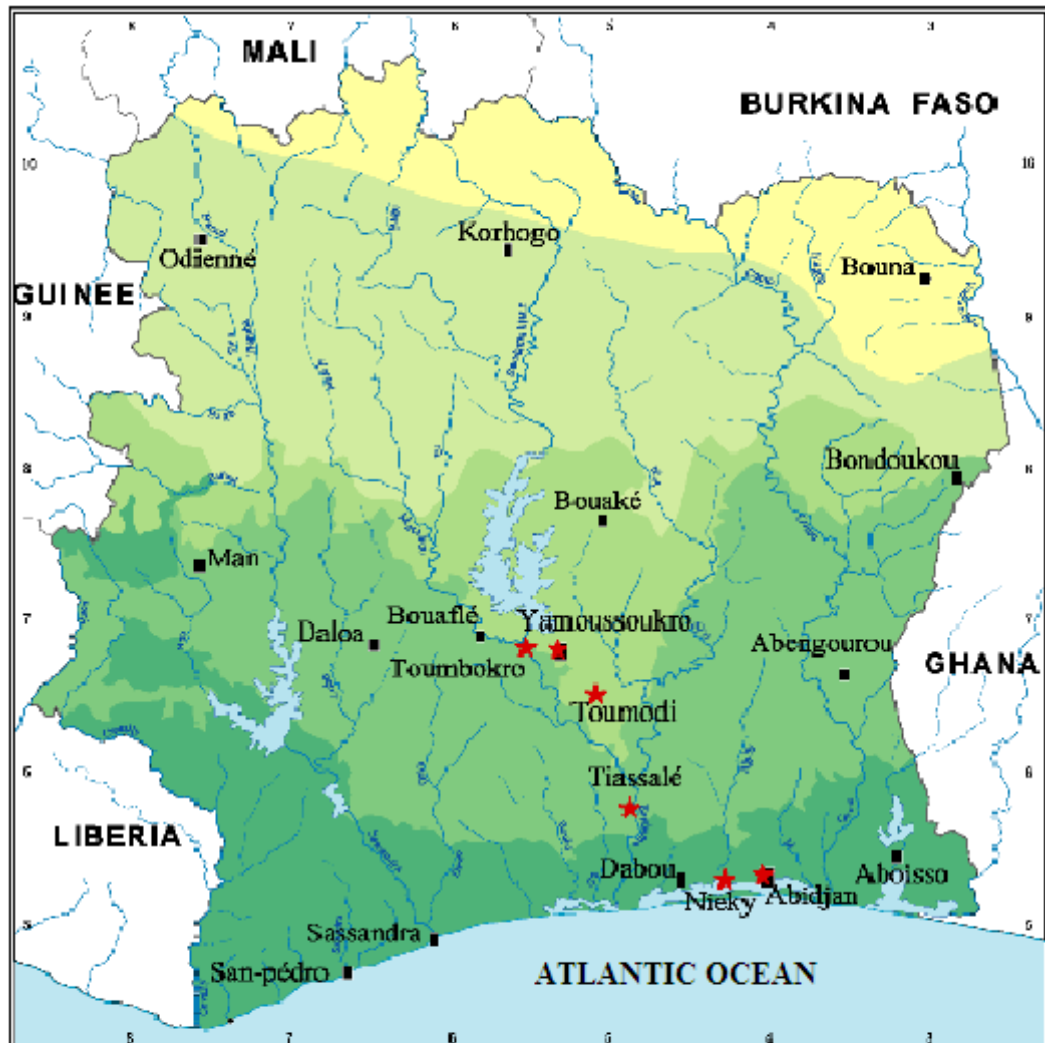

**LEGEND**

-  Sudanese sector
-  Sub-sudanese sector
-  Pre-forester sector
-  Sector of clear forest

-  Capitals political and economic
-  Main cities
-  Study area
-  River

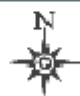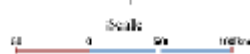

Supplement: MOESM1 [file 9549322]
